# Supplementary material for: A bifunctional electrolyte for activating Mg–Li hybrid batteries
Source: Royal Society of Chemistry journal article supplement (doi:10.1039/d3ta01794j), 2023-01-01
Supplement: d3ta01794j1.pdf [file d3ta01794j1.pdf]

## Supporting Information

### **A bifunctional electrolyte for activating Mg-Li hybrid batteries**

Wenlu Sun,<sup>†a</sup> Lu Chen,<sup>†a</sup> Jun Wang,<sup>†a</sup> Hui Zhang,<sup>b</sup> Zhilong Quan,<sup>a</sup> Fang Fu,<sup>a</sup> Huabin Kong,<sup>a</sup> Shibin Wang<sup>\*a</sup> and Hongwei Chen<sup>\*a, c</sup>

<sup>a</sup> College of Materials Science and Engineering, Huaqiao University, Xiamen 361021, P. R. China.

<sup>b</sup> National Key Laboratory of High-efficiency Utilization of Coal and Green Chemical Engineering, Ningxia University, Yinchuan 750021, P. R. China.

<sup>c</sup> Xiamen Key Laboratory of Optoelectronic Materials and Advanced Manufacturing, College of Materials Science and Engineering, Huaqiao University, Xiamen 361021, P. R. China.

Corresponding Author

\*Shibin Wang, E-mail: sbwang@hqu.edu.cn

\*Hongwei Chen, E-mail: hwchen@hqu.edu.cn

[<sup>†</sup>] These authors contributed equally to this work.

### Chemicals and materials:

Carboxylated MWCNTs were purchased from XFnano Materials Tech Co., Ltd., China. 1,3,5-benzenetricarboxaldehyde was obtained from Shanghai Tengqian Biotechnology Co., Ltd.  $\text{Mg}(\text{HDMS})_2$ , and LiTFSI was purchased from Sigma-Aldrich. Super P, PVDF, and Cabon Paper were purchased from Shenzhen Kejing Star Technology Co. Melamine, anhydrous dimethyl sulfoxide, Magnesium foil, and other solvents/reagents were all purchased from Aladdin industrial corporation, Shanghai, China., unless otherwise mentioned.

### Supplemental results and discussion

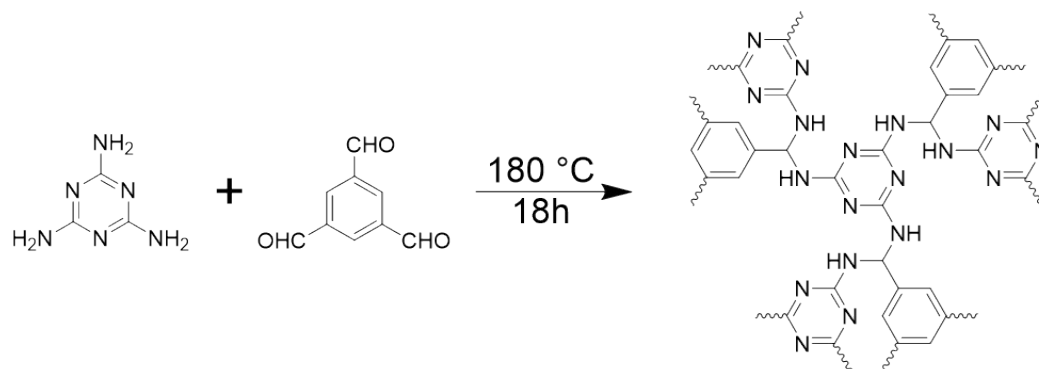

**Figure S1.** Schematic of the condensation reaction to synthesize POF.[S1]

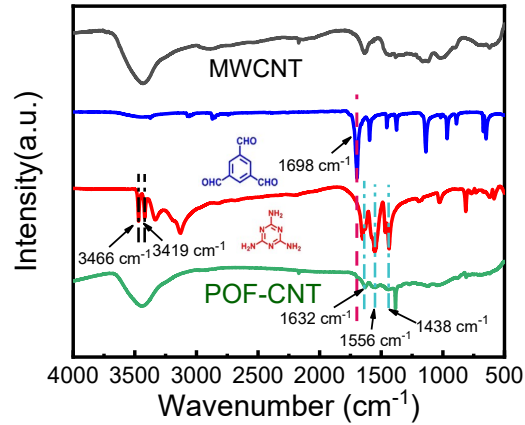

**Figure S2.** FTIR measurement of the condensation of synthesis POF. For POF on CNT, the stretching vibration of  $\text{-NH}_2$  ( $3466$  and  $3419$   $\text{cm}^{-1}$ ) from melamine and the stretching vibration of the aldehyde group ( $1698$   $\text{cm}^{-1}$ ) disappear. Meanwhile, the characteristic bands of quadrant ( $1556$   $\text{cm}^{-1}$ ) and semicircle ( $1438$   $\text{cm}^{-1}$ ) stretching of the triazine ring prove that the polycondensation is successful.

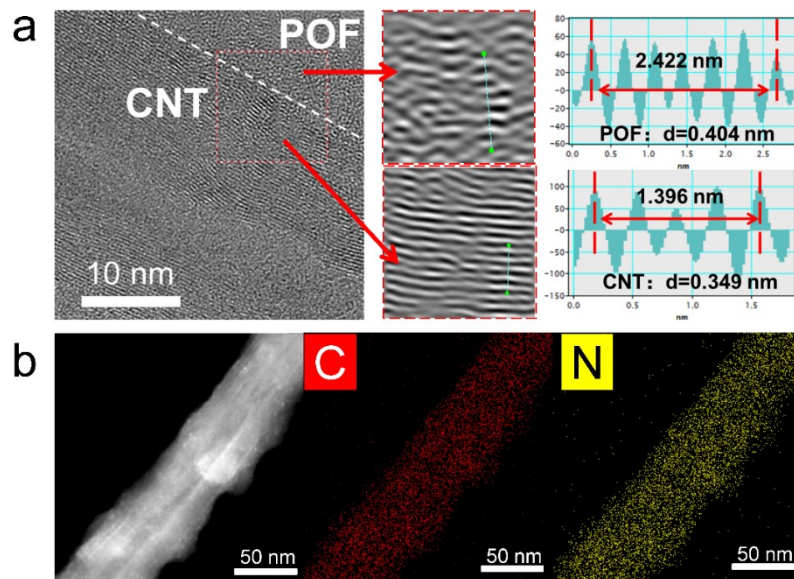

**Figure S3.** (a) TEM images and lattice fringes and (b) EDX mapping of POF on CNT. In order to exactly calculate the  $d$  values at different regions, more than four lattice fringes were measured. The  $d$  value of POF is measured to be  $0.404$  nm, indicating loosely layered-stacking structure compared to CNT with  $d$  value of  $0.349$  nm.

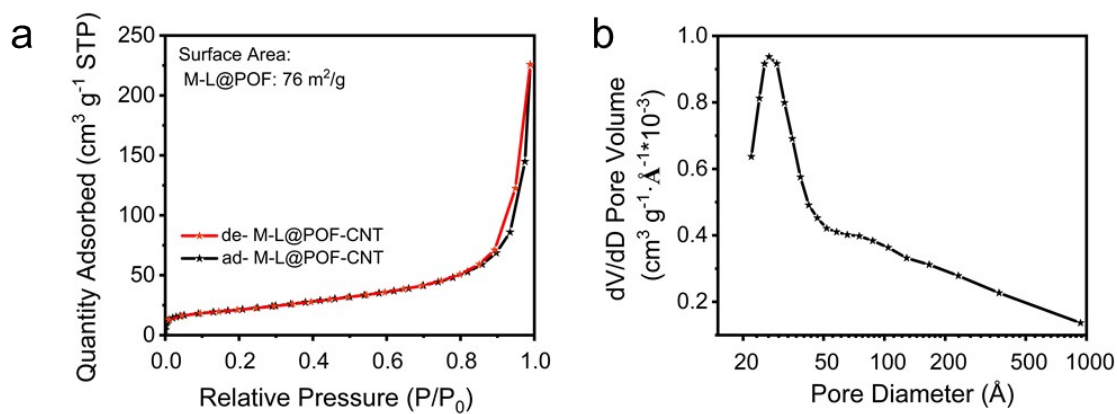

**Figure S4.** (a) BET surface and (b) pore distribution of POF.

**Table S1.** The BET results of POF.

|                                      |                          |
|--------------------------------------|--------------------------|
| BET Surface Area                     | 75.9 m <sup>2</sup> /g   |
| BJH Pore Volume                      | 0.344 cm <sup>3</sup> /g |
| BJH Adsorption average pore diameter | 204 Å                    |
| BJH Desorption average pore diameter | 194 Å                    |

**Table S2.** Comparison of typical cathode performances in MIBs.

| Materials                                                            | Capacity<br>/ mAh g <sup>-1</sup> | Voltage platform<br>/ V vs. Mg/Mg <sup>2+</sup> | Cycle number                               | Current density<br>/mA g <sup>-1</sup> | Ref.             |
|----------------------------------------------------------------------|-----------------------------------|-------------------------------------------------|--------------------------------------------|----------------------------------------|------------------|
| TiS <sub>2</sub> nanotubes                                           | 184                               | ~0.98                                           | 80                                         | 10                                     | S2               |
| VO <sub>2</sub> (B)                                                  | 143                               | 2.17                                            | 60                                         | 100                                    | S3               |
| H <sub>2</sub> V <sub>3</sub> O <sub>8</sub>                         | 132                               | ~1.9                                            | 100                                        | 40                                     | S4               |
| GO/V <sub>2</sub> O <sub>5</sub>                                     | 140                               | ~1.5                                            | 20                                         | 20                                     | S5               |
| V <sub>2</sub> O <sub>5</sub> •nH <sub>2</sub> O@rGO                 | ~97                               | ~2.1                                            | 200                                        | 1000                                   | S6               |
| MoS <sub>2</sub> /C<br>microspheres                                  | 119                               | 1.4                                             | 20                                         | 50                                     | S7               |
| MoS <sub>2</sub> /rGO                                                | 74                                | 1.4                                             | 50                                         | 20                                     | S8               |
| Cu <sub>x</sub> Mo <sub>6</sub> S <sub>8</sub> (x ≥ 1)               | 108                               | ~1.0                                            | 50                                         | 6                                      | S9               |
| Mg <sub>0.3</sub> V <sub>2</sub> O <sub>5</sub> •1.1H <sub>2</sub> O | ~90                               | ~2.1                                            | 10,000                                     | 2000                                   | S10              |
| Mg <sub>0.21</sub> Ti <sub>3</sub> C <sub>2</sub> T <sub>x</sub>     | ~50                               | 1.5                                             | 60                                         | 100                                    | S11              |
| Mo <sub>6</sub> S <sub>8-y</sub> Se <sub>y</sub>                     | ~90                               | ~1.1                                            | 100                                        | 100                                    | S12              |
| Birnessite MnO <sub>2</sub>                                          | 183                               | 2.8                                             | 30                                         | 100                                    | S13              |
| V <sub>2</sub> O <sub>5</sub> -PEO                                   | 96                                | ~1.6                                            | 35                                         | 10                                     | S14              |
| PVP-MoS <sub>2</sub>                                                 | 132                               | ~0.7                                            | 100                                        | 20                                     | S15              |
| Ti <sub>3</sub> C <sub>2</sub> T <sub>x</sub> /CTAB                  | 135                               | 0.9                                             | 250                                        | 200                                    | S16              |
| Expanded TiS <sub>2</sub>                                            | ~120                              | ~0.5                                            | 400                                        | 240                                    | S17              |
| Amorphous V <sub>2</sub> O <sub>5</sub>                              | ~130                              | 2.2                                             | 40                                         | 50                                     | S18              |
| CTF                                                                  | ~114                              | 1.35                                            | 3000                                       | 570                                    | S18              |
| Mg-P4AQ                                                              | 130                               | 1.37                                            | 100                                        | 130                                    | S20              |
| <b>M-L@POF</b>                                                       | <b>221</b>                        | ~0.5 V                                          | <b>3000</b><br><b>(83 %<br/>retention)</b> | <b>360</b>                             | <b>This work</b> |

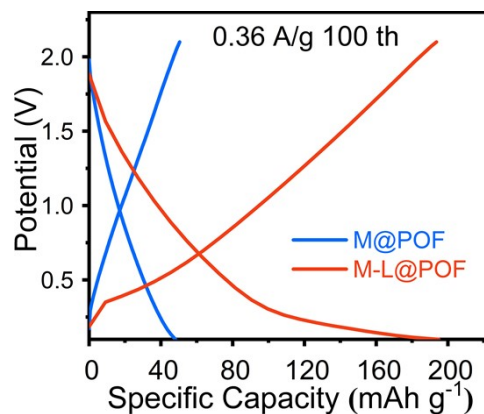**Figure S5.** The 100<sup>th</sup> cycle galvanostatic charge and discharge curves of the M@POF and M-L@POF with current density of 0.36 A/g.

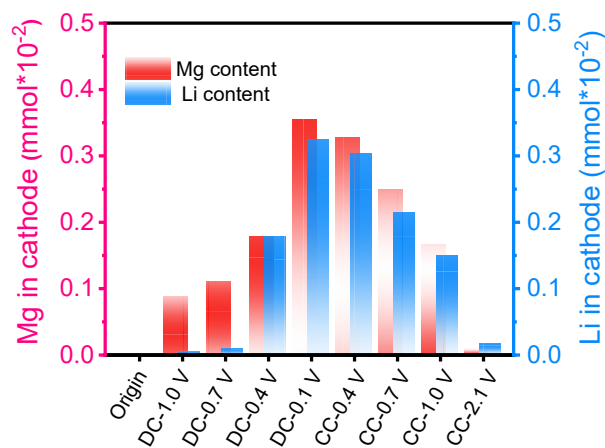

**Figure S6.** Mg/Li contents of the M-L@POF cathode at different charge/discharge stages of the 100th cycle. (CC: constant current charge, DC: constant current discharge)

**Table S3.** Calculation of capacity contribution of Mg/Li species.

|           | Potential vs. Mg <sup>2+</sup> /Mg V | Dual-salt electrolyte          |                                | Mg electrolyte    |
|-----------|--------------------------------------|--------------------------------|--------------------------------|-------------------|
|           |                                      | Mg capacity contribution mAh/g | Li capacity contribution mAh/g | Mg capacity mAh/g |
| Discharge | 1.0                                  | <b>60.0</b>                    | <b>1.5</b>                     | 16.7              |
|           | 0.7                                  | <b>92.1</b>                    | <b>3.6</b>                     | 24.5              |
|           | 0.4                                  | <b>91.3</b>                    | <b>45.4</b>                    | 34.1              |
|           | 0.1                                  | <b>244.9</b>                   | <b>111.4</b>                   | 48.2              |
| Charge    | 0.4                                  | <b>70.6</b>                    | <b>24.9</b>                    | 3.0               |
|           | 0.7                                  | <b>104.0</b>                   | <b>59.7</b>                    | 10.2              |
|           | 1.0                                  | <b>151.7</b>                   | <b>59.7</b>                    | 18.5              |
|           | 2.1                                  | <b>248.6</b>                   | <b>105.4</b>                   | 50.5              |

**Note S1.** The calculation of the actual contribution of magnesium ions and lithium ions in the electrode material was conducted based on the ICP results (Figure S6) and GCD profiles. The amount of relative balance charge is calculated from the Mg:Li atomic ratio, thereby calculating the contribution of the corresponding element in the specific capacity. See the formulas below and Table S3 for details.

$$2 * P_{Mg} * C = C_{Mg}$$

$$P_{Li} * C = C_{Li}$$

$$C_{Mg} + C_{Li} = C$$

The  $C$  means corresponding charge and discharge capacity. The  $P_{Mg}$  and  $P_{Li}$  represent the proportion of working ions (Mg and Li) to the total working ions in cathode at the corresponding working potential. The charge transfer amount for Mg ion is considered as double electron transfer and Li ion as single electron transfer.

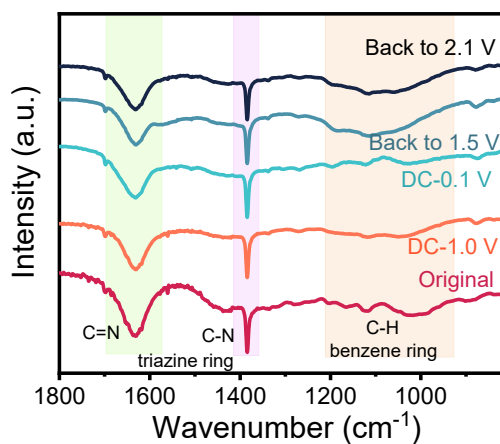

**Figure S7.** *Ex-situ* FTIR measurement of the discharged M-L@POF electrode.

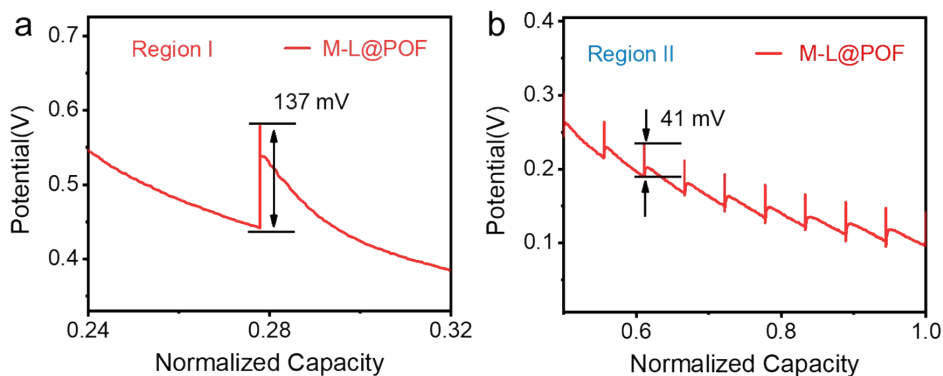

**Figure S8.** The enlarged graph of overpotential in Region I (a) and Region II (b) with M-L@POF.

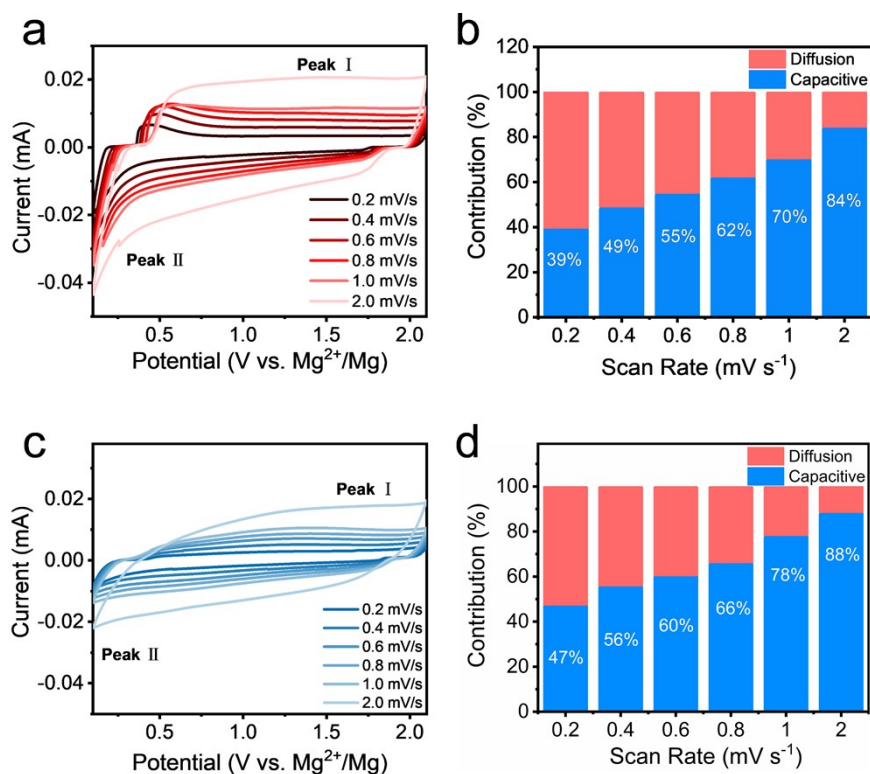

**Figure S9.** CV curves of M-L@POF and M@POF at different sweep rates (a) and (c) respectively, (b) and (d) refer to the corresponding capacity contribution. Calculation of the b value also was taken value from the corresponding peak current respectively. The Peak I and Peak II correspond to the peak position of the positive sweep and the peak position of the negative sweep.



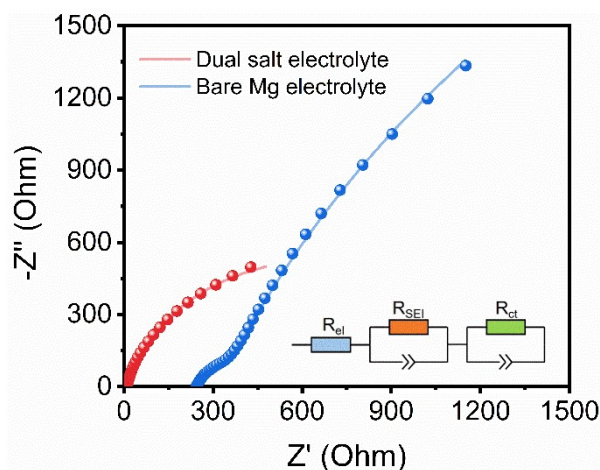

**Figure S10.** EIS measurement of Mg//Mg cells with different electrolytes.

The interfacial resistance in Mg//Mg cells was calculated according to *Nat Mater.* 2017 16(5): 572-579. The total impedances are  $\sim 1322$  and  $8190 \Omega \text{ cm}^2$  for the cells cycled in Mg-Li electrolyte and Mg electrolyte, respectively. The ion conductivities of electrolytes were measured via two stainless steel electrodes separated by polytetrafluorethylene (PTFE) film, with EIS technology tested between 0.1 Hz to 1 MHz. The obtained electrolyte resistances are  $\sim 1.4 \Omega \text{ cm}^2$  for dual salt electrolyte and  $\sim 230 \Omega \text{ cm}^2$  for bare Mg electrolyte. According to these data, the interface resistance is equal to the total impedance minus the bulk electrolyte impedance, then divided by two. The final interface resistance is  $\sim 660$  and  $3980 \Omega \text{ cm}^2$  for the cells cycled in dual salt and bare Mg electrolyte, respectively.

**Table S4. The calculated interfacial resistance**

|                       | Bulk electrolyte<br>Resistance<br>( $\Omega \text{ cm}^2$ ) | Total<br>Resistance<br>( $\Omega \text{ cm}^2$ ) | Interface Resistance<br>( $\Omega \text{ cm}^2$ ) |
|-----------------------|-------------------------------------------------------------|--------------------------------------------------|---------------------------------------------------|
| Dual salt electrolyte | 1.4                                                         | 1322                                             | 660                                               |
| Bare Mg electrolyte   | 230                                                         | 8190                                             | 3980                                              |

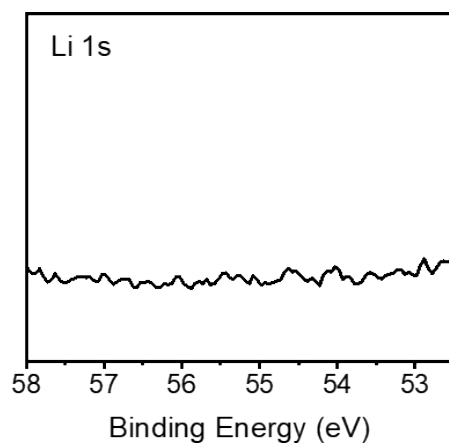

**Figure S11.** XPS Li1s spectra of the Mg foil after 200 h cycled in dual-salt electrolyte. No Li electrodeposited on the surface of Mg foil.

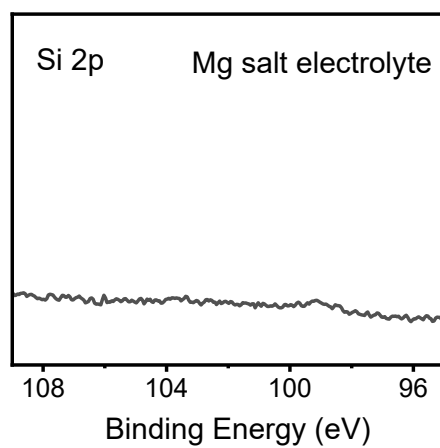

**Figure S12.** XPS Si2p spectra of the Mg metals operated 200 h cycled in bare Mg salt electrolyte. No obvious signal of organic-silicon component Si2p can be found.

**Table S5. Calculations of actual cell energy density.**

|                                                         | Cathode Active<br>Material Mass<br>Loading | Cathode<br>Areal Mass<br>Loading | Practical<br>Cathode Area<br>Capacity | Cathode Active<br>Material special<br>Capacity | Cathode Active<br>Material special<br>energy | Anode Area<br>Mass<br>Loading | Electrolyte<br>Density | Electrolyte<br>area mass | Total<br>area<br>mass | Total<br>energy area<br>output | Actual<br>energy<br>density |
|---------------------------------------------------------|--------------------------------------------|----------------------------------|---------------------------------------|------------------------------------------------|----------------------------------------------|-------------------------------|------------------------|--------------------------|-----------------------|--------------------------------|-----------------------------|
|                                                         | mg cm <sup>-2</sup>                        | mg cm <sup>-2</sup>              | mAh cm <sup>-2</sup>                  | mAh g <sup>-1</sup>                            | Wh kg <sup>-1</sup>                          | mg cm <sup>-2</sup>           | g cm <sup>-3</sup>     | mg cm <sup>-2</sup>      | mg cm <sup>-2</sup>   | mWh cm <sup>-2</sup>           | Wh kg <sup>-1</sup>         |
| <b>M-L@POF<br/>(This work)</b>                          | 1.05                                       | 1.50                             | 0.37                                  | 354.25                                         | 161.48                                       | 0.17                          | 1.10                   | 5.78                     | 7.44                  | 169.55                         | 22.78                       |
| <b>M@POF<br/>(This work)</b>                            | 1.05                                       | 1.50                             | 0.07                                  | 63.09                                          | 52.31                                        | 0.17                          | 1.00                   | 5.25                     | 6.92                  | 54.93                          | 7.94                        |
| <b>M@POF coupled<br/>with dual salt<br/>electrolyte</b> | 1.05                                       | 1.50                             | 0.07                                  | 63.09                                          | 52.31                                        | 0.17                          | 1.10                   | 5.78                     | 7.44                  | 54.93                          | 7.38                        |
| <i>CTF</i> [S19]                                        | 1.05                                       | 1.50                             | 0.12                                  | 114.00                                         | 153.90                                       | 0.05                          | 1.20                   | 6.30                     | 7.85                  | 161.60                         | 20.57                       |
| <i>PHV-Cl</i> [S22]                                     | 1.05<br>(estimated)                        | 3.00                             | 0.18                                  | 171.00                                         | 222.30                                       | 0.08                          | 1.30                   | 6.83                     | 9.91                  | 233.42                         | 23.56                       |
| <i>Mg-P14AQ</i> [S20]                                   | 1.00                                       | 2.50                             | 0.19                                  | 193.00                                         | 265.38                                       | 0.09                          | 1.10                   | 5.50                     | 8.09                  | 265.38                         | 32.81                       |
| <i>Mo<sub>6</sub>S<sub>8</sub></i> [S23]                | 3.92                                       | 4.90                             | 0.31                                  | 80.00                                          | 108.00                                       | 0.14                          | 1.30                   | 25.48                    | 30.52                 | 423.36                         | 13.87                       |

\*CTF, PHV-Cl, Mg-P14AQ, and Mo<sub>6</sub>S<sub>8</sub> were used as Mg cathodes.

**Note S2.** The calculation of energy density takes into account the mass of the cathode (active materials + conductive additive + binder), anode, and electrolyte (solvent + salt). The theory specific capacity of Mg was regarded as 2205 mAh g<sup>-1</sup>. The amount of electrolytes addition are set to 5 uL/mg<sub>active-material</sub>, referring to the theoretical amount of NCA vs. Li to reflect the idealized actual application situation, rather than just calculating the active materials or only considering the salt. The calculation was conducted partially referenced to *Adv. Energy Mater.* 2019, 9, 1803170.

$$Energy\ Output_{total} = Mass_{active\ materials} \times Energy\ Density_{active\ materials}$$

$$Mass_{total} = Mass_{cathode} + Mass_{anode} + Mass_{electrolyte}$$

$$Energy\ Density_{over\ all} = Energy\ Output_{total} \div Mass_{total}$$

## References

- S1. Liu, L.; Li, P.-Z.; Zhu, L.; Zou, R.; Zhao, Y. *Polymer* 54 (2013) 596-600.
- S2. Z. Tao, L. Xu, X. Gou, J. Chen, H. Yuan, *Chem. Commun.* 40 (2004) 2080–2081.
- S3. T. Luo, Y. Liu, H. Su, R. Xiao, L. Huang, Q. Xiang, Y. Zhou, C. Chen, *Electrochim. Acta* 260 (2018) 805–813
- S4. M. Rastgoo-Deylami, M.S. Chae, S. Hong, *Chem. Mater.* 30 (2018) 7464–7472.
- S5. X. Du, G. Huang, Y. Qin, L. Wang, *RSC Adv.* 5 (2015) 76352–76355.
- S6. Q. An, Y. Li, H. Deog Yoo, S. Chen, Q. Ru, L. Mai, Y. Yao, Graphene decorated vanadium oxide nanowire aerogel for long-cycle-life magnesium battery cathodes, *Nano Energy* 18 (2015) 265–272
- S7. Y. Liu, L. Jiao, Q. Wu, J. Du, Y. Zhao, Y. Si, Y. Wang, H. Yuan, *J. Mater. Chem. A* 1 (19) (2013) 5822.
- S8. Y. Liu, L. Jiao, Q. Wu, Y. Zhao, K. Cao, H. Liu, Y. Wang, H. Yuan, *Nanoscale* 5 (20) (2013) 9562.
- S9. S.-G. Woo, J.-Y. Yoo, W. Cho, M.-S. Park, K.J. Kim, J.-H. Kim, J.-S. Kim, Y.-J. Kim, *RSC Adv.* 4 (103) (2014) 59048–59055
- S10. Y. Xu, X. Deng, Q. Li, G. Zhang, F. Xiong, S. Tan, Q. Wei, J. Lu, J. Li, Q. An, L. Mai, *Chem* 5 (5) (2019) 1194–1209.
- S11. M. Zhao, C.E. Ren, M. Alhabeab, B. Anasori, M.W. Barsoum, Y. Gogotsi, *ACS Appl. Energy Mater.* 2 (2019) 1572–1578.
- S12. E. Levi, E. Lancry, A. Mitelman, D. Aurbach, G. Ceder, D. Morgan, O. Isnard, *Chem. Mater.* 18(2006) 5492-5503.
- S13. K.W. Nam, S. Kim, S. Lee, M. Salama, I. Shterenberg, Y. Gofer, J. Kim, E. Yang, C. S. Park, J. Kim, S. Lee, W. Chang, S. Doo, Y.N. Jo, Y. Jung, D. Aurbach, J.W. Choi, *Nano Lett.* 15 (2015) 4071–4079.
- S14. S.D. Perera, R.B. Archer, C.A. Damin, R. Mendoza-Cruz, C.P. Rhodes, *J. Power Sources* 343 (2017) 580–591.
- S15. C. Wu, G. Zhao, S. Gong, N. Zhang, K. Sun, *J. Mater. Chem. A* 7 (2019) 4426–4430.
- S16. M. Xu, S. Lei, J. Qi, Q. Dou, L. Liu, Y. Lu, Q. Huang, S. Shi, X. Yan, *ACS Nano* 12 (4) (2018) 3733–3740.
- S17. H.D. Yoo, Y. Liang, H. Dong, J. Lin, H. Wang, Y. Liu, L. Ma, T. Wu, Y. Li, Q. Ru, Y. Jing, Q. An, W. Zhou, J. Guo, J. Lu, S.T. Pantelides, X. Qian, Y. Yao, *Nat. Commun.* 8 (2017) 339.
- S18. Z. Wei, D. Wang, X. Yang, C. Wang, G. Chen, F. Du, *Adv. Mater. Interfaces* 5 (2018) 1800639
- S19. R. Sun, S. Hou, C. Luo, X. Ji, L. Wang, L. Mai, C. Wang, *Nano Lett.* 20 (2020) 3880.
- S20. H. Dong, Y. Liang, O. Tutusaus, R. Mohtadi, Y. Zhang, F. Hao, Y. Yao, *Joule* 3 (2019) 782.
- S21. Betz, J.; Bieker, G.; Meister, P.; Placke, T.; Winter, M.; Schmuck, R. *Adv. Energy Mater.* 9 (2019) 1803170.
- S22. Ikhe, A. B.; Naveen, N.; Sohn, K.-S.; Pyo, M. *Electrochim. Acta* 283 (2018) 393–400.

S23.Saha, P.; Jampani, P. H.; Datta, M. K.; Okoli, C. U.; Manivannan, A.; Kumta, P. N. J. Electrochem. Soc. 161 (2014) A593–A598.
